# Supplementary material
Source: PubMed Central journal article supplement (PMC3939018)
Supplement: NIHMS385389-supplement-4.pdf [file NIHMS385389-supplement-4.pdf]

## SUPPLEMENTAL MATERIAL

**Supplemental Table 1. Clinical characteristics of surgical patients with mitral valve repair and MRI-derived LVEF > 60% prior to surgery**

|                                          | Control<br>(n=51) | MR                      |                          |
|------------------------------------------|-------------------|-------------------------|--------------------------|
|                                          |                   | Pre-operative<br>(n=20) | Post-operative<br>(n=20) |
| Age, year                                | 44±14             | 54±8*                   | 55±8*                    |
| % Female                                 | 53                | 15*                     | 15*                      |
| Body surface area, m <sup>2</sup>        | 1.9±0.24          | 2.01±0.23               | 2.01±0.21                |
| Heart rate, beats/min                    | 67±12             | 68±10                   | 70±11                    |
| Systolic BP, mm Hg                       | 118±13            | 125±13                  | 124±12                   |
| Diastolic BP, mm Hg‡                     | 75±10             | 77±9                    | 79±9                     |
| LV ED volume index, ml/m <sup>2</sup> ‡  | 69±10             | 112±24*                 | 76±14†                   |
| LV ES volume index, ml/m <sup>2</sup> ‡  | 25±7              | 39±10*                  | 33±9*†                   |
| LV SV volume index, ml/ m <sup>2</sup> ‡ | 44±7              | 73±16*                  | 44±8†                    |
| LV EF, %‡                                | 64±7              | 65±4                    | 57±7*†                   |
| LV ED dimension, mm‡                     | 49±4              | 59±7*                   | 49±5†                    |
| LV ES dimension, mm‡                     | 32±4              | 37±5*                   | 34±7*†                   |
| LV ED mass index, g/m <sup>2</sup>       | 50±10             | 70±13*                  | 56±11†                   |
| LV ED volume/mass, ml/g                  | 1.45±0.38         | 1.62±0.26               | 1.41±0.35†               |
| LV ES R/T ratio‡                         | 1.48±0.40         | 1.65±0.54               | 1.71±0.65                |
| Peak early filling rate, ml/sec‡         | 378±110           | 686±273*                | 288±91†                  |

Values are n or mean±SD. BP: blood pressure; R/T ratio: radius /wall thickness measured at distal LV; \*: P<0.05 vs. control; †: P<0.05 vs. pre-operative MR; ‡: log transformation was performed. Comparison results were adjusted for age.

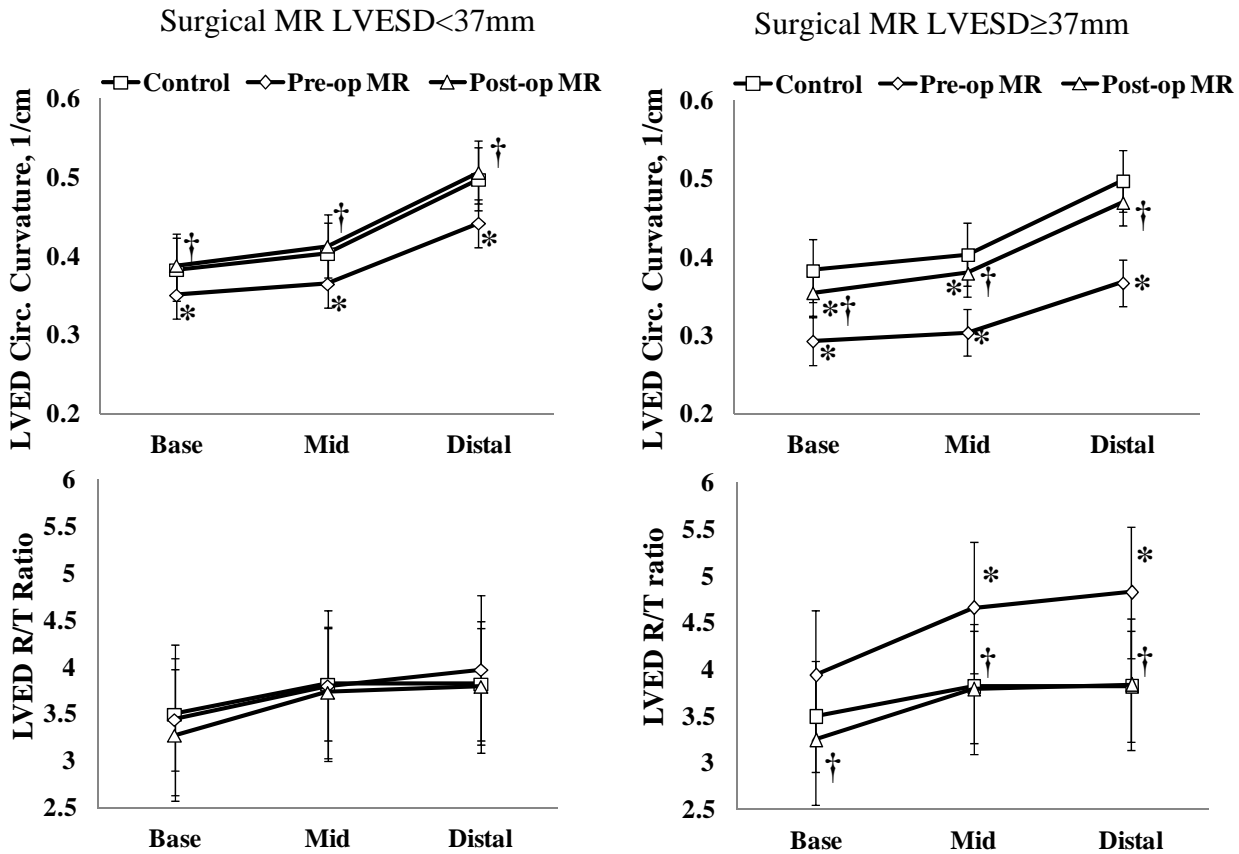

**Supplemental Figure 1. Comparison of LV end-diastolic (ED) geometric remodeling in controls and in surgical MR patients (patients with MRI-derived LVEF < 60% prior to surgery are excluded) with pre-operative LVESD < and ≥ 37mm before and after surgery**

These data demonstrate progressive LV remodeling at ED in the two MR groups and their recovery after surgery. LVED R/T ratio is normalized after surgery in both MR groups.

Circumferential curvatures in MR LVESD < 37mm are normalized after surgery while in MR LVESD ≥ 37mm, circumferential curvatures are increased yet not normalized. \*: P < 0.05 vs. controls; †: P < 0.05 vs. pre-operative MR.

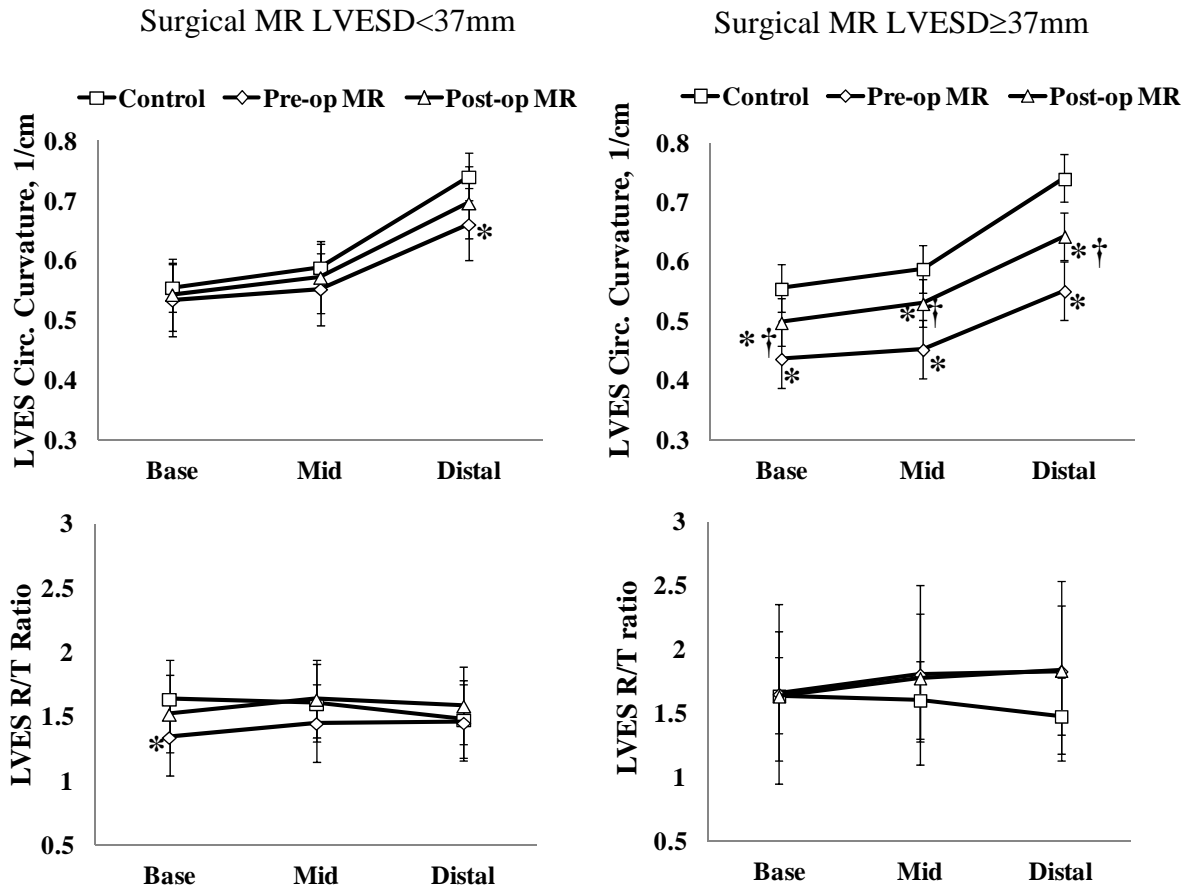

**Supplemental Figure 2. Comparison of LV end-systolic (ES) geometric remodeling in controls and in surgical MR patients (patients with MRI-derived LVEF < 60% prior to surgery are excluded) with pre-operative LVEDD < and ≥ 37mm before and after surgery**

These data demonstrate progressive LV remodeling at ES that is not normalized after surgery in the MR patients with pre-operative LVEDD ≥ 37mm, while it is normalized after surgery in MR patients with pre-operative LVEDD < 37mm. \*: P < 0.05 vs. controls; †: P < 0.05 vs. pre-operative MR.

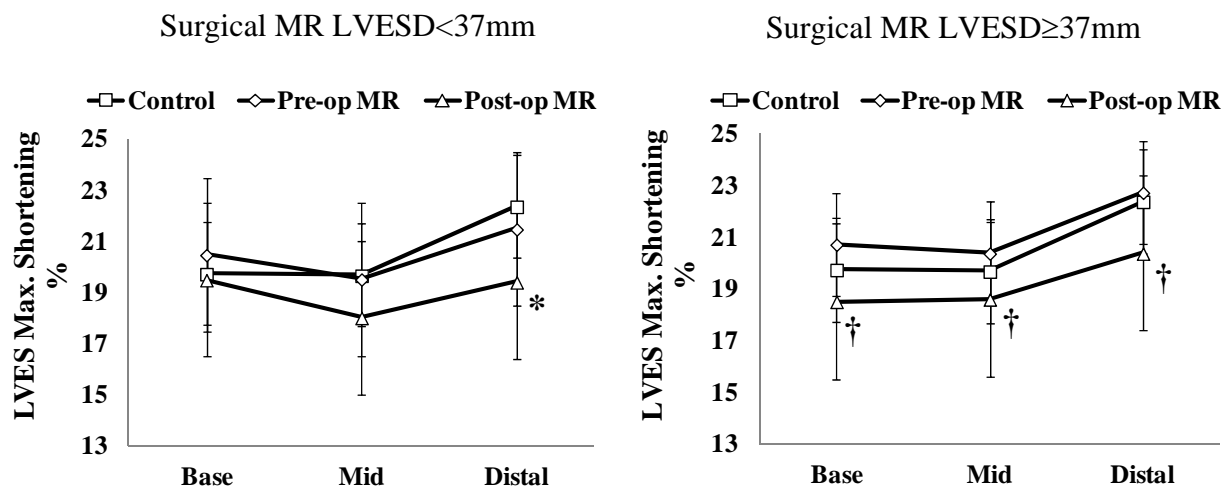

**Supplemental Figure 3. Comparison of LV end-systolic (ES) maximum shortening in controls and in surgical MR patients (patients with MRI-derived LVEF < 60% prior to surgery are excluded) with pre-operative LVESD < and ≥ 37mm before and after surgery**

These data demonstrate that maximum shortening is decreased below normal in both groups of MR patients. Moreover, LVES maximum shortening in patients with pre-operative LVESD ≥ 37 mm is significantly decreased post-operatively vs. pre-operatively. \*: P < 0.05 vs. controls; †: P < 0.05 vs. pre-operative MR.
